## Prevalence of extended-spectrum $\beta$ -lactamase (ESBL)-producing *Enterobacteriaceae* in wastewater: a systematic review and meta-analysis

Nawel Zaatout <sup>a,\*</sup>, Samia Bouras <sup>b</sup> and Nouria Slimani<sup>b</sup>

<sup>a</sup> Faculty of Natural and Life Sciences, University of Batna 2, Batna, Algeria

<sup>b</sup> Faculty of Natural and Life Sciences, University of Setif, Setif, Algeria

\*Corresponding author. E-mail: zaatout5@hotmail.com

 NZ, 0000-0001-6526-374X; SB, 0000-0002-0202-6234

### ABSTRACT

Wastewater is considered a hotspot niche of multi-drug and pathogenic bacteria such as *Enterobacteriaceae*-producing extended-spectrum beta-lactamases (ESBL-E). Thus, the aim of this meta-analysis was to evaluate the prevalence of ESBL-E in different wastewater sources. Different databases (Medline, EMBASE, and Cochrane Library) were searched from inception to March 2021. Data were analyzed using random-effects modeling, and subgroup and meta-regression analyses were used to ascertain heterogeneity among the subgroups. Fifty-seven observational studies were selected, and the pooled prevalence of ESBL-E in wastewater was 24.81% (95% CI, 19.28–30.77). *Escherichia coli* had the highest ESBL prevalence. The *bla*<sub>CTX-M</sub> genes were the most prevalent in the selected studies (66.56%). The pooled prevalence of ESBL was significantly higher in reports from America (39.91%, 95% CI, 21.82–59.51) and reports studying hospital and untreated wastewaters (33.98%, 95% CI, 23.82–44.91 and 27.36%, 95% CI, 19.12–36.42). Overall, this meta-analysis showed that the prevalence of ESBL-E in wastewater is increasing over time and that hospital wastewater is the most important repository of ESBL-E. Therefore, there is a need for developing new sewage treatment systems that decrease the introduction of resistant bacteria and antibiotic residues.

**Key words:**  $\beta$ -lactamases, *bla*<sub>CTX-M</sub>, *Enterobacteriaceae*, ESBL, wastewater

### HIGHLIGHTS

- The global prevalence of *Enterobacteriaceae*-producing extended-spectrum beta-lactamases (ESBL-E) in wastewater was found to be 24.81%.
- The pooled prevalence of ESBL-E was significantly higher in reports studying hospital wastewater.
- The highest prevalence of ESBL-E was in America, and the lowest prevalence was in Europe.
- Among ESBL genes, *bla*<sub>CTX-M</sub> genes had the highest prevalence, followed by *bla*<sub>TEM</sub> and *bla*<sub>SHV</sub>.

### INTRODUCTION

*Enterobacteriaceae* are responsible for causing infections in humans and animals. They rely on their ability to resist antibiotics and on their virulence arsenal that facilitates their dissemination. The emergence of antimicrobial resistance in *Enterobacteriaceae* has become a significant concern to public health (Azuma & Hayashi 2020); it is believed that wastewater can contribute to propagating their antibiotic resistance (Meletis 2016). Wastewater is considered a hotspot niche of pathogenic bacteria and genetic exchange of genes encoding antibiotic resistance (Lepuschitz *et al.* 2019). Antibiotics released into wastewater increase the selective pressure on *Enterobacteriaceae*, thus causing antibiotic resistance to proliferate (Fouz *et al.* 2020). Moreover, wastewater treatments do not entirely eliminate the microbial contaminants; therefore, wastewater is mostly discharged to the receiving rivers enabling resistant *Enterobacteriaceae* and genes encoding antibiotic resistance to reach agricultural soils and water bodies used for domestic purposes (Korzeniewska & Harnisz 2013a). From there, these bacteria can disseminate into human and animal populations (Gatica & Cytryn 2013).

$\beta$ -Lactams are one of the most commonly used antibiotics that are usually released in wastewater; these antibiotics can induce the production of  $\beta$ -lactamases in *Enterobacteriaceae* (Bonomo 2017). Among these  $\beta$ -lactamases, extended-spectrum

This is an Open Access article distributed under the terms of the Creative Commons Attribution Licence (CC BY-NC-ND 4.0), which permits copying and redistribution for non-commercial purposes with no derivatives, provided the original work is properly cited (<http://creativecommons.org/licenses/by-nc-nd/4.0/>).

beta-lactamases (ESBLs) are among the most widely spread resistance mechanisms (Teklu *et al.* 2019). They are a group of enzymes that can break down penicillins,  $\beta$ -lactamase inhibitors, and third- and fourth-generation cephalosporins and monobactams (Rahman *et al.* 2018). Most of them have been developed through spontaneous mutations of reduced spectrum  $\beta$ -lactamases (Reinthaler *et al.* 2010). Moreover, ESBLs are encoded by genes belonging mostly to three groups called *bla*<sub>CTX-M</sub>, *bla*<sub>TEM</sub>, and *bla*<sub>SHV</sub> (Pishtiwan & Khadija 2019). These genes are mostly located on conjugative plasmids, facilitating the horizontal gene transfer among bacterial groups (Jesumirhewe *et al.* 2020). Other less-studied types of ESBLs have also been found, including OXA (oxacillinase), VEB (Vietnamese extended-spectrum  $\beta$ -lactamase), PER (*Pseudomonas* extended-resistant), and GES (Guyana extended-spectrum  $\beta$ -lactamase) (Amirkamali *et al.* 2017).

The prevalence of ESBL-producing *Enterobacteriaceae* in wastewater varies with respect to geographical differences, wastewater source, and antimicrobial prescription patterns, most of the studies on ESBL-E in wastewater are limited to geographical areas such as Asia and Europe, and there has been no meta-analysis to the best of our knowledge that evaluated the prevalence of ESBL-E in different wastewater sources. Therefore, this meta-analysis aimed to determine the prevalence of ESBL-producing *Enterobacteriaceae* in different wastewater sources and analyze their influencing factors.

## MATERIALS AND METHODS

### Study and data collection

This meta-analysis was conducted according to the Preferred Reporting Items for Systematic Reviews and Meta-Analyses (PRISMA) guidelines (Moher *et al.* 2009). A comprehensive literature search of PubMed/MEDLINE, EMBASE, and the Cochrane Library was performed until March 2021 to find potentially relevant articles. We also reviewed manually the references cited by the studies included to identify additional studies. The terms applied in electronic searches are listed in Supplementary Material, Table S1.

### Inclusion and exclusion criteria

Studies were included if they met the following criteria: observational cross-sectional investigating the prevalence of ESBL-producing *Enterobacteriaceae* in wastewater. Exclusion criteria were included: (1) the absence of the total number of isolates, (2) the ESBL identification method is unclear, and (3) studies with the format of a congress abstract, a review article, or a book chapter.

### Data extraction and quality assessment

Two authors independently screened the literature and extracted data, and the following variables were extracted: (1) authors' names, (2) location, (3) year of publication, (4) sample size, (5) the use of treatment or not, (6) prevalence of ESBL isolates, (7) species detected, (8) source of samples, (9) ESBL genes, and (10) ESBL identification methods. Since all the included studies were cross-sectional, each article's quality was assessed using Joanna Briggs Institute's quality assessment checklist (Munn *et al.* 2015) (Supplementary Material, Table S2).

### Statistical analysis and data synthesis

STATA 16.0 (StataCorp LP, College Station, TX, USA) was used for the meta-analysis. The prevalence of ESBL-producing *Enterobacteriaceae* was estimated. The heterogeneity among studies was examined by the forest plot and the  $I^2$  heterogeneity test, in which 0–40, 50–60, 50–90, and 75–100% represented low, moderate, substantial, and considerable heterogeneity, respectively. Due to the high level of heterogeneity, the random-effects model was selected for analysis. Freeman–Tukey double arcsine transformation was used to avoid excluding studies where the prevalence of ESBL-E was close to 0% (Freeman & Tukey 1950; Nyaga *et al.* 2014). A subgroup analysis was performed, with a breakdown by the continents, use of treatment, year of publication, and the wastewater origin. A value of  $p \leq 0.05$  indicated statistical significance in the pooled effect. Meta-regression was used to ascertain heterogeneity among the subgroups. The selected independent factors are the wastewater origin (hospital wastewater, municipal wastewater, wastewater from rivers, hospital and municipal wastewaters and their receiving rivers, wastewater from other sources (farms and slaughterhouses)), continents (Africa, Europe, Asia, and America), the use of treatment (treated wastewater, untreated wastewater, and treated and untreated wastewater), and year of publication (2007–2015, 2016, 2017, 2018, 2019, and 2020). The number of studies from 2007 to 2015 is small. Therefore, they were put in the same category, so they will not be omitted by the software. The risk of publication bias across the studies was assessed by the funnel plot and the Egger test; the asymmetry of the funnel plot and statistical significance of

Egger's regression test ( $p$ -value  $<0.05$ ) were suggestive of publication bias (Egger *et al.* 1997). Sensitivity analysis was assessed to evaluate the robustness of the meta-analysis.

## RESULTS

### Eligible articles

The literature search process is shown in Figure 1. The database search yielded a total of 394 publications. After eliminating duplicates, 300 were selected to review their titles and abstracts, resulting in the exclusion of 214 publications; 86 studies were

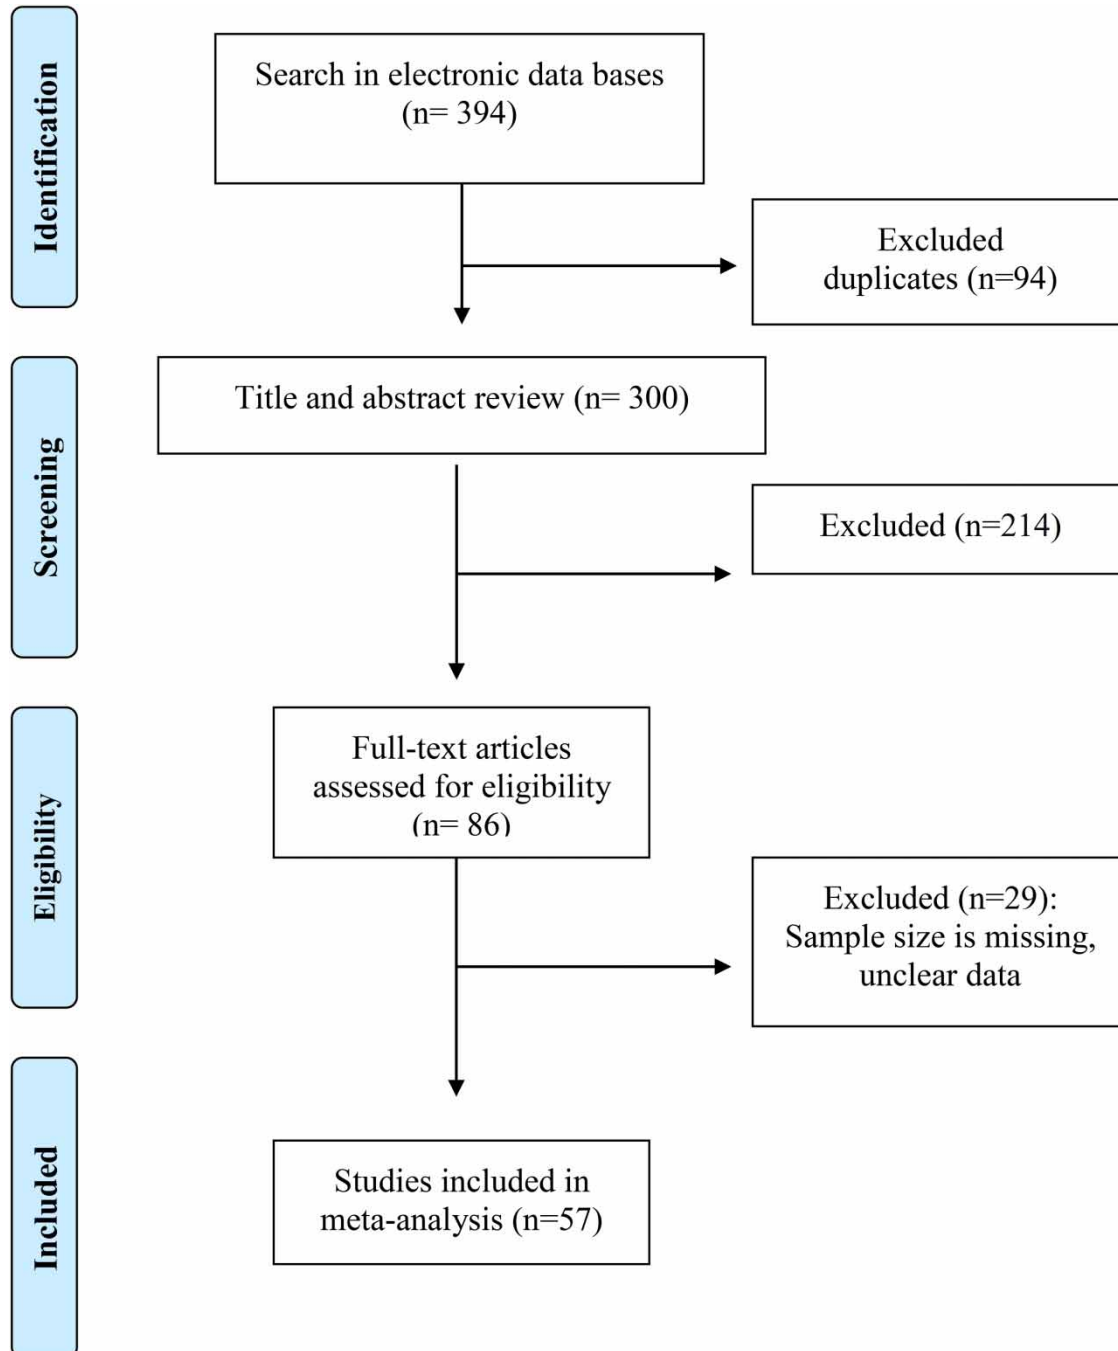

**Figure 1** | PRISMA flow diagram of the selection process of the included studies.

assessed then for eligibility by full-text reviewing based on the review's inclusion and exclusion criteria, and 29 were removed. Finally, 57 articles were ultimately included in the analysis.

### Characteristics of the eligible studies

The main characteristics of the included studies are summarized in Table 1. The most used method for ESBL-E detection was the double-disk synergy method. In total, 28 countries from four continents studied ESBL-E prevalence in wastewater (Europe: 18, Asia: 18, Africa: 13, and America: 8). Among the 57 included studies, 17 studies examined hospital wastewater, 15 studies examined municipal wastewater, 13 studies examined hospital and municipal wastewaters and their receiving rivers, seven studies examined wastewater effluents in rivers, and five studies examined wastewater from other sources such as farms and slaughterhouses. Moreover, 23 studies examined the occurrence of ESBL-E in untreated wastewater, nine studies in treated wastewater, and 25 studies in untreated and treated wastewater. The selected studies were published between 2007 and 2020, 23.59% were carried out between the years 2007–2015 ( $n = 13$ ), 21% were carried out in 2019 ( $n = 12$ ), and 18.54% were carried in 2020 ( $n = 11$ ).

The most common producer of ESBL in wastewater was found to be *Escherichia coli* (51 studies), followed by *Klebsiella* (29 studies) and *Enterobacter* (18 studies). Moreover, the *bla*<sub>CTX-M</sub> gene was the most studied (30 studies), followed by the *bla*<sub>TEM</sub> and *bla*<sub>SHV</sub> genes (25 studies).

### Pooled prevalence of ESBL-E

A total of 2,618 isolates of ESBL-E from 20,230 *Enterobacteriaceae* were found in the selected publications (Table 2), and the estimated prevalence varied widely across the studies ranging from 0.00% (95% CI, 0.00–7.13) to 85.71% (95% CI, 48.69–97.43) with substantial heterogeneity ( $\chi^2 = 4461.79$ ,  $I^2 = 98.74\%$ ,  $p < 0.001$ ). The random-effect estimated pooled prevalence of ESBL-E was 24.81% (95% CI, 19.28, 30.77). Figure 2 shows the pooled prevalence of ESBL-E.

### Variables associated with ESBL-E prevalence

Subgroup meta-analysis results are presented in Table 2. The analysis by continent showed that the highest prevalence of ESBL-E was in America at 39.91%, and the lowest prevalence was in Europe at 10.19% (95% CI, 5.73–15.72). The pooled prevalence of ESBL was significantly higher ( $p < 0.001$ ) in reports studying hospital wastewater (33.98%, 95% CI, 23.82–44.91) and, more specifically, in untreated wastewater (27.36%, 95% CI, 19.12–36.42). The number of reports on ESBL-E prevalence in wastewater increased over time, and the highest number of studies per year was reported in 2019 ( $n = 12$ ). Forest plots of the ESBL-E prevalence among studies stratified by continents, wastewater sources, the year, and the use of treatment are outlined in Figures 3–6.

Among *Enterobacteriaceae* species, *E. coli* had the highest ESBL prevalence (15.02%, 95% CI, 11.12–19.36) (Table 3) followed by *Klebsiella* spp. (9.60%, 95% CI, 19.54–38.29) and *Proteus* spp. (3.80%, 95% CI, 1.61, 6.76). Moreover, among ESBL genes, the *bla*<sub>CTX-M</sub> gene had the highest prevalence (66.56%, 95% CI, 53.98–78.15), followed by *bla*<sub>TEM</sub> (49.88%, 95% CI, 35.01–64.76) and *bla*<sub>SHV</sub> (21.58%, 95% CI, 13.71–30.49).

Meta-regression evaluating the effect of confounding factors on the prevalence of ESBL-E was performed, and the results are summarized in Table 4. In the univariable meta-regression, an association was found between ESBL prevalence and several factors at  $p \leq 0.25$ . In the final multivariable meta-regression model, a positive association was found between ESBL-E carriage and studies reported in America (Coef. = 0.22,  $p = 0.01$ ).

### Analysis of publication bias and sensitivity

The publication bias among the included papers was evaluated with Egger's test, which showed some evidence of publication bias, with a bias co-efficient of 1.56 ( $p = 0.002$ ). The funnel plot's shape was not symmetrical (Supplementary Material, Figure S1). Thus, there is a potential for publication bias. Moreover, the sensitivity analysis showed no individual study that influenced the overall meta-analysis estimate, which indicates the robustness of the results (Supplementary Material, Table S3).

## DISCUSSION

Wastewater is an important environmental supplier of antibacterial-resistant bacteria and antimicrobial-resistance genes (Marti *et al.* 2013). In this study, the occurrence of ESBL-producing *Enterobacteriaceae* in different wastewater sources has been evaluated. There are some big differences between hospital, municipal, and animal wastewaters. Thus, we have

**Table 1** | Characteristics of the included studies

| References                        | No. of<br>ESBL | <i>Enterobacteriaceae</i> | Wastewater origin                                             | Year | Treatment             | Methods/guideline                           | Country    |
|-----------------------------------|----------------|---------------------------|---------------------------------------------------------------|------|-----------------------|---------------------------------------------|------------|
| Prado <i>et al.</i> (2007)        | 20             | 43                        | Hospital wastewater                                           | 2007 | Treated and untreated | CDT, CLSI                                   | Brazil     |
| Sabaté <i>et al.</i> (2008)       | 10             | 85                        | Wastewater from other sources (farms and slaughterhouses)     | 2008 | Treated and untreated | E-test, CLSI                                | Spain      |
| Luczkiewicz <i>et al.</i> (2010)  | 1              | 259                       | Urban wastewater                                              | 2010 | Treated and untreated | Phoenix Automated Microbiology System, CLSI | Poland     |
| Chagas <i>et al.</i> (2011)       | 96             | 213                       | Hospital wastewater                                           | 2011 | Treated               | DDST, CLSI                                  | Brazil     |
| Mokracka <i>et al.</i> (2012)     | 12             | 1,832                     | Urban wastewater                                              | 2012 | Treated and untreated | DDST, CLSI                                  | Poland     |
| Diallo <i>et al.</i> (2013)       | 9              | 1,248                     | Wastewater from other sources (farms and slaughterhouses)     | 2013 | Treated               | E-test, CLSI                                | France     |
| Korzeniewska & Harnisz (2013a)    | 150            | 310                       | Hospital wastewater                                           | 2013 | Untreated             | CDT, CLSI                                   | Poland     |
| Korzeniewska & Harnisz (2013b)    | 34             | 246                       | Urban wastewater                                              | 2013 | Treated and untreated | CDT, CLSI                                   | Poland     |
| Bessa <i>et al.</i> (2014)        | 29             | 144                       | Hospital and municipal wastewaters and their receiving rivers | 2014 | Treated               | Disk approximation test, CLSI               | Portugal   |
| Chandran <i>et al.</i> (2014)     | 87             | 190                       | Hospital wastewater                                           | 2014 | Untreated             | CDT                                         | India      |
| Čornejová <i>et al.</i> (2015)    | 27             | 104                       | Urban wastewater                                              | 2015 | Treated and untreated | Microdilution, CLSI                         | Slovakia   |
| Kwak <i>et al.</i> (2015)         | 73             | 1,894                     | Hospital and municipal wastewaters and their receiving rivers | 2015 | Treated and untreated | AREB microplates, CLSI                      | Sweden     |
| Kotlarska <i>et al.</i> (2015)    | 5              | 774                       | Hospital and municipal wastewaters and their receiving rivers | 2015 | Treated and untreated | DDST, EUCAST                                | Poland     |
| De Oliveira & Van Der Sand (2016) | 32             | 60                        | Hospital wastewater                                           | 2016 | Treated and untreated | DDST, CLSI                                  | Brazil     |
| Drieux <i>et al.</i> (2016)       | 25             | 389                       | Hospital wastewater                                           | 2016 | Untreated             | DDST, CA-SFM                                | France     |
| Dropa <i>et al.</i> (2016)        | 7              | 200                       | Urban wastewater                                              | 2016 | Untreated             | DDST, CLSI                                  | Brazil     |
| Egbule (2016)                     | 4              | 96                        | Hospital wastewater                                           | 2016 | Untreated             | DDST, CLSI                                  | Nigeria    |
| Lenart-Boroń (2016)               | 23             | 196                       | Wastewater-receiving rivers                                   | 2016 | Untreated             | DDST, EUCAST                                | Poland     |
| Maheshwari <i>et al.</i> (2016)   | 34             | 103                       | Hospital wastewater                                           | 2016 | Untreated             | CDT, CLSI                                   | India      |
| Sultana <i>et al.</i> (2016)      | 30             | 166                       | Hospital wastewater                                           | 2016 | Untreated             | DDST                                        | Bangladesh |
| Caltagirone <i>et al.</i> (2017)  | 30             | 132                       | Hospital and municipal wastewaters and their receiving rivers | 2017 | Treated and untreated | DDST, EUCAST                                | Italy      |
| Conte <i>et al.</i> (2017)        | 55             | 152                       | Hospital and municipal wastewaters and their receiving rivers | 2017 | Treated and untreated | VITEK-2 system and MALDI-TOF, CLSI          | Brazil     |
| Lien <i>et al.</i> (2017)         | 115            | 265                       | Hospital wastewater                                           | 2017 | Treated and untreated | CDT, CLSI                                   | Vietnam    |

(Continued.)

Table 1 | Continued

| References                     | No. of<br>ESBL | <i>Enterobacteriaceae</i> | Wastewater origin                                             | Year | Treatment             | Methods/guideline              | Country     |
|--------------------------------|----------------|---------------------------|---------------------------------------------------------------|------|-----------------------|--------------------------------|-------------|
| Obasi <i>et al.</i> (2017)     | 6              | 7                         | Urban wastewater                                              | 2017 | Untreated             | Vitek 2, E-test strips, CLSI   | Nigeria     |
| Tafoukt <i>et al.</i> (2017)   | 3              | 20                        | Wastewater-receiving rivers                                   | 2017 | Untreated             | DDST, CLSI                     | Algeria     |
| Adelowo <i>et al.</i> (2018)   | 48             | 98                        | Hospital and municipal wastewaters and their receiving rivers | 2018 | Untreated             | DDST, CLSI                     | Nigeria     |
| Daoud <i>et al.</i> (2018)     | 51             | 70                        | Hospital wastewater                                           | 2018 | Untreated             | DDST, E-test ESBL strips, CLSI | Lebanon     |
| Debabza <i>et al.</i> (2018)   | 143            | 254                       | Hospital and municipal wastewaters and their receiving rivers | 2018 | Treated and untreated | DDST, CA-SFM                   | Algeria     |
| Falodun <i>et al.</i> (2018)   | 30             | 189                       | Wastewater-receiving rivers                                   | 2018 | Untreated             | DDST, CLSI                     | Nigeria     |
| Flach <i>et al.</i> (2018)     | 89             | 4,028                     | Urban wastewater                                              | 2018 | Treated and untreated | DDST, EUCAST                   | Sweden      |
| Park <i>et al.</i> (2018)      | 14             | 75                        | Wastewater from other sources (farms and slaughterhouses)     | 2018 | Treated and untreated | DDST, EUCAST                   | South Korea |
| Siddiqui <i>et al.</i> (2018)  | 175            | 506                       | Wastewater-receiving rivers                                   | 2018 | Untreated             | PDCT, CLSI                     | India       |
| Tokajian <i>et al.</i> (2018)  | 21             | 34                        | Hospital and municipal wastewaters and their receiving rivers | 2018 | Untreated             | DDST, CLSI                     | Lebanon     |
| Vital <i>et al.</i> (2018)     | 27             | 147                       | Wastewater-receiving rivers                                   | 2018 | Untreated             | DDST, CLSI                     | Philippines |
| Adekanmbi <i>et al.</i> (2019) | 17             | 58                        | Hospital wastewater                                           | 2019 | Untreated             | DDST, CLSI                     | Nigeria     |
| Bartley <i>et al.</i> (2019)   | 20             | 40                        | Hospital and municipal wastewaters and their receiving rivers | 2019 | Treated and untreated | VITEK-2, CLSI                  | Brazil      |
| Chaudhry <i>et al.</i> (2019)  | 17             | 112                       | Hospital wastewater                                           | 2019 | Untreated             | DDST, CLSI                     | Pakistan    |
| Falodun & Oladimeji (2019)     | 35             | 200                       | Hospital wastewater                                           | 2019 | Treated and untreated | DDST, CLSI                     | Nigeria     |
| Haberecht <i>et al.</i> (2019) | 47             | 70                        | Urban wastewater                                              | 2019 | Treated and untreated | CHROMagar ESBL                 | USA         |
| Li <i>et al.</i> (2019)        | 50             | 70                        | Wastewater from other sources (farms and slaughterhouses)     | 2019 | Treated and untreated | DDST, CLSI                     | China       |
| Mahato <i>et al.</i> (2019)    | 6              | 13                        | Hospital wastewater                                           | 2019 | Treated               | DDST, CLSI                     | Nepal       |
| Miyagi & Hirai (2019)          | 141            | 249                       | Hospital and municipal wastewaters and their receiving rivers | 2019 | Untreated             | DDST, CLSI                     | Japan       |
| Paulshus <i>et al.</i> (2019)  | 314            | 3,123                     | Urban wastewater                                              | 2019 | Untreated             | AREB microplates, CLSI         | Norway      |
| Raven <i>et al.</i> (2019)     | 192            | 388                       | Urban wastewater                                              | 2019 | Treated and untreated | Brilliance ESBL agar, Vitek    | UK          |
| Sghaier <i>et al.</i> (2019)   | 58             | 123                       | Urban wastewater                                              | 2019 | Treated               | DDST, CLSI                     | Tunisia     |
| Tesfaye <i>et al.</i> (2019)   | 6              | 54                        | Wastewater from other sources (farms and slaughterhouses)     | 2019 | Untreated             | DDST, CLSI                     | Ethiopia    |

(Continued.)



Table 1 | Continued

| References                        | No. of<br>ESBL | <i>Enterobacteriaceae</i> | Wastewater origin                                             | Year | Treatment             | Methods/guideline                     | Country      |
|-----------------------------------|----------------|---------------------------|---------------------------------------------------------------|------|-----------------------|---------------------------------------|--------------|
| Adekanmbi <i>et al.</i> (2020)    | 12             | 33                        | Hospital wastewater                                           | 2020 | Treated and untreated | DDST, CLSI                            | Nigeria      |
| Banjo <i>et al.</i> (2020)        | 12             | 23                        | Hospital wastewater                                           | 2020 | Untreated             | DDST, CLSI                            | Nigeria      |
| Khan <i>et al.</i> (2020)         | 35             | 61                        | Urban wastewater                                              | 2020 | Treated               | CHROMagar ESBL, DDST, CLSI            | UAE          |
| King <i>et al.</i> (2020)         | 14             | 130                       | Hospital and municipal wastewaters and their receiving rivers | 2020 | Treated and untreated | MASTDISCS D68C AmpC/ESBL kits, EUCAST | South Africa |
| Lenart Boroń <i>et al.</i> (2020) | 0              | 50                        | Wastewater-receiving rivers                                   | 2020 | Treated               | DDST, EUCAST                          | Poland       |
| Saima <i>et al.</i> (2020)        | 1              | 10                        | Wastewater-receiving rivers                                   | 2020 | Untreated             | DDST, CDT, CLSI                       | Pakistan     |
| Smyth <i>et al.</i> (2020)        | 89             | 498                       | Urban wastewater                                              | 2020 | Treated               | DDST, CLSI                            | Ireland      |
| Surleac <i>et al.</i> (2020)      | 8              | 34                        | Hospital and municipal wastewaters and their receiving rivers | 2020 | Treated and untreated | ChromID ESBL agar, CLSI               | Romania      |
| Urano <i>et al.</i> (2020)        | 5              | 64                        | Urban wastewater                                              | 2020 | Treated and untreated | DDST, CLSI                            | Japan        |
| Urase <i>et al.</i> (2020)        | 13             | 264                       | Urban wastewater                                              | 2020 | Treated               | DDST, CLSI                            | Japan        |
| Zagui <i>et al.</i> (2020)        | 11             | 34                        | Hospital and municipal wastewaters and their receiving rivers | 2020 | Treated and untreated | DDST, CLSI                            | Brazil       |

CDT, combined disc diffusion method; CLSI, Clinical & Laboratory Standards Institute; DDST, The Double Disc Synergy Test; PDCT, Phenotypic disc confirmatory test; CA-SFM, Comité de l'Antibiogramme de la société Française de Microbiologie.

chosen to do the subgroup analysis and study the prevalence of ESBL-E in each source separately. In total, the pooled prevalence of ESBL-E in wastewater was substantially important (24.81%), with the highest prevalence in untreated wastewater (27.36%). Untreated wastewater is loaded with different pollutants that can facilitate the proliferation of resistant bacteria (Preisner 2020). However, Du *et al.* (2015) suggested that biological treatments in wastewater treatment plants can also enhance the bacterial proliferation and genetic exchange.

Moreover, hospital wastewater had the highest prevalence of ESBL-E (33.98%). This could be due to the high usage of antibiotics in hospitals compared with public usage. Kümmerer (2009) found that the concentration of antibiotics in hospital effluents is 100 times higher than in municipal effluents. Moreover, the intensive use of antibiotics in hospitals could also contribute in the ESBL emergence (Debabza *et al.* 2018), which turns the hospital into a highly selective environment for ESBL-producing bacteria (Duong *et al.* 2008). Wastewater effluents in rivers had the lowest prevalence of ESBL-E. Wastewaters are usually treated before being released to waterways, which could explain the low prevalence of ESBL-E in rivers (Numberger *et al.* 2019).

Europe had the highest number of studies on ESBL-E and the lowest prevalence of ESBL-E. On the other hand, America (mainly South America because 7/8 of studies are in Brazil) and Asia had the highest prevalence of ESBL-E (39.91 and 33.95%, respectively), and according to the meta-regression results, studies reported in America are significantly associated with the presence of ESBL-E in wastewater. In developing countries, wastewater generated from farming, communities, and hospital effluents does not obtain appropriate treatment, and few functioning treatment facilities are available. This inadequate management can lead to environmental contamination with resistant bacteria such as ESBL-E into the water environment (Behnam *et al.* 2020; WHO 2018).

The highest prevalence of ESBL-E in wastewater was reported in studies undertaken in 2019. Gelband *et al.* (2015) analyzed data from 73 countries over the past 10 years and found that antibiotic use is growing steadily worldwide, which can explain, in part, the increase of ESBL-E in wastewater in the last 2 years. On the other hand, the biggest number of studies on ESBL-E in wastewater was also observed between the years 2019–2020; this could possibly mean that public awareness of the challenges related to the presence of resistant bacteria in wastewater is starting to rise lately.

**Table 2** | Stratified pooled prevalence estimates of ESBL-producing *Enterobacteriaceae* in wastewater

| Subgroups                                                     | No. of studies | No. of ESBL | No. of <i>Enterobacteriaceae</i> | Pooled estimate (%) of ESBL | 95% Confidence interval | Heterogeneity chi-squared ( $\chi^2$ ) | Heterogeneity test, $I^2$ (%) | Heterogeneity test, $p$ -value |
|---------------------------------------------------------------|----------------|-------------|----------------------------------|-----------------------------|-------------------------|----------------------------------------|-------------------------------|--------------------------------|
| <b>Continents</b>                                             |                |             |                                  |                             |                         |                                        |                               |                                |
| Europe                                                        | 18             | 1,112       | 15,700                           | 10.19                       | 5.73, 15.72             | 1,645.83                               | 98.97                         | <0.001                         |
| Asia                                                          | 18             | 830         | 2,433                            | 33.95                       | 24.05, 44.58            | 449.28                                 | 96.22                         | <0.001                         |
| Africa                                                        | 13             | 388         | 1,285                            | 29.31                       | 17.86, 42.17            | 250.07                                 | 95.20                         | <0.001                         |
| America                                                       | 8              | 288         | 812                              | 39.91                       | 21.82, 59.51            | 206.09                                 | 96.60                         | <0.001                         |
| Overall                                                       | 57             | 2,618       | 20,230                           | 24.81                       | 19.28, 30.77            | 4,461.79                               | 98.74                         | <0.001                         |
| <b>Wastewater origin</b>                                      |                |             |                                  |                             |                         |                                        |                               |                                |
| Hospital wastewater                                           | 17             | 743         | 2,344                            | 33.98                       | 23.82, 44.91            | 442.77                                 | 96.39                         | <0.001                         |
| Municipal wastewater                                          | 15             | 929         | 11,267                           | 18.83                       | 11.15, 27.88            | 1,410.51                               | 99.01                         | <0.001                         |
| Wastewater from rivers                                        | 7              | 259         | 1,118                            | 13.67                       | 5.36, 24.64             | 96.29                                  | 93.77                         | <0.001                         |
| Hospital and municipal wastewaters and their receiving rivers | 13             | 598         | 3,969                            | 29.41                       | 15.03, 46.19            | 1,123.05                               | 98.93                         | <0.001                         |
| Wastewater from other sources (farms and slaughterhouses)     | 5              | 89          | 1,532                            | 18.43                       | 1.04, 48.62             | 273.15                                 | 98.54                         | <0.001                         |
| Overall                                                       | 57             | 2,618       | 20,230                           | 24.81                       | 19.28, 30.77            | 4,461.79                               | 98.74                         | <0.001                         |
| <b>The use of treatment</b>                                   |                |             |                                  |                             |                         |                                        |                               |                                |
| Treated wastewater                                            | 9              | 335         | 2,614                            | 21.11                       | 7.40, 39.17             | 649.12                                 | 98.77                         | <0.001                         |
| Untreated wastewater                                          | 23             | 1,229       | 6,350                            | 27.36                       | 19.12, 36.42            | 956.04                                 | 97.70                         | <0.001                         |
| Treated and untreated wastewater                              | 25             | 1,054       | 11,266                           | 23.93                       | 15.87, 33.03            | 2,286.92                               | 98.95                         | <0.001                         |
| Overall                                                       | 57             | 2,618       | 20,230                           | 24.81                       | 19.28, 30.77            | 4,461.79                               | 98.74                         | <0.001                         |
| <b>Year of publication</b>                                    |                |             |                                  |                             |                         |                                        |                               |                                |
| 2020                                                          | 11             | 200         | 1,201                            | 19.32                       | 10.31, 30.17            | 144.56                                 | 93.08                         | <0.001                         |
| 2019                                                          | 12             | 903         | 4,500                            | 37.62                       | 22.18, 54.43            | 766.42                                 | 98.56                         | <0.001                         |
| 2018                                                          | 9              | 598         | 5,401                            | 33.93                       | 14.01, 57.34            | 1,191.61                               | 99.33                         | <0.001                         |
| 2017                                                          | 5              | 209         | 576                              | 34.73                       | 22.53, 47.96            | 28.30                                  | 85.86                         | <0.001                         |
| 2016                                                          | 7              | 155         | 1,210                            | 15.51                       | 7.02, 26.45             | 126.54                                 | 95.26                         | <0.001                         |
| 2007–2015                                                     | 13             | 553         | 7,342                            | 15.08                       | 7.17, 25.19             | 1,276.01                               | 99.06                         | <0.001                         |
| Overall                                                       | 57             | 2,618       | 20,230                           | 24.81                       | 19.28, 30.77            | 4,461.79                               | 98.74                         | <0.001                         |

The studies included in this meta-analysis reported that *E. coli* was the most isolated ESBL-producing *Enterobacteriaceae* (15.02%). These bacteria are indicators of fecal contamination, agents of several kinds of nosocomial and community-acquired infections, and are often associated with therapy failure when cephalosporins are used (Kola *et al.* 2007; Shakya *et al.* 2017). The high prevalence of these enzymes in *E. coli* is maybe due to the ability of *E. coli* to survive for long periods and multiply in wastewater without being affected with wastewater treatments, which leads to the selection and emergence of ESBL-producing *E. coli* (Jang *et al.* 2017). Moreover, the *bla*<sub>CTX-M</sub> genes were the most prevalent in the selected studies, accounting for a significant percentage of the ESBL genes detected (66.56%). This high prevalence of CTX-M-type ESBL producers could be due to the global spreading of clones with epidemic and pandemic potential, such as the extra-intestinal pathogenic *E. coli* (ExPEC) ST131 known for its ability to produce extended-spectrum  $\beta$ -lactamases, such as CTX-M-15 (Cantón *et al.* 2012; Tanaka *et al.* 2019).

These findings enhance our understanding of ESBL-producing *Enterobacteriaceae* in wastewater. However, some limitations need to be addressed; in some recent studies, ESBL-E isolates were directly isolated using selective media without



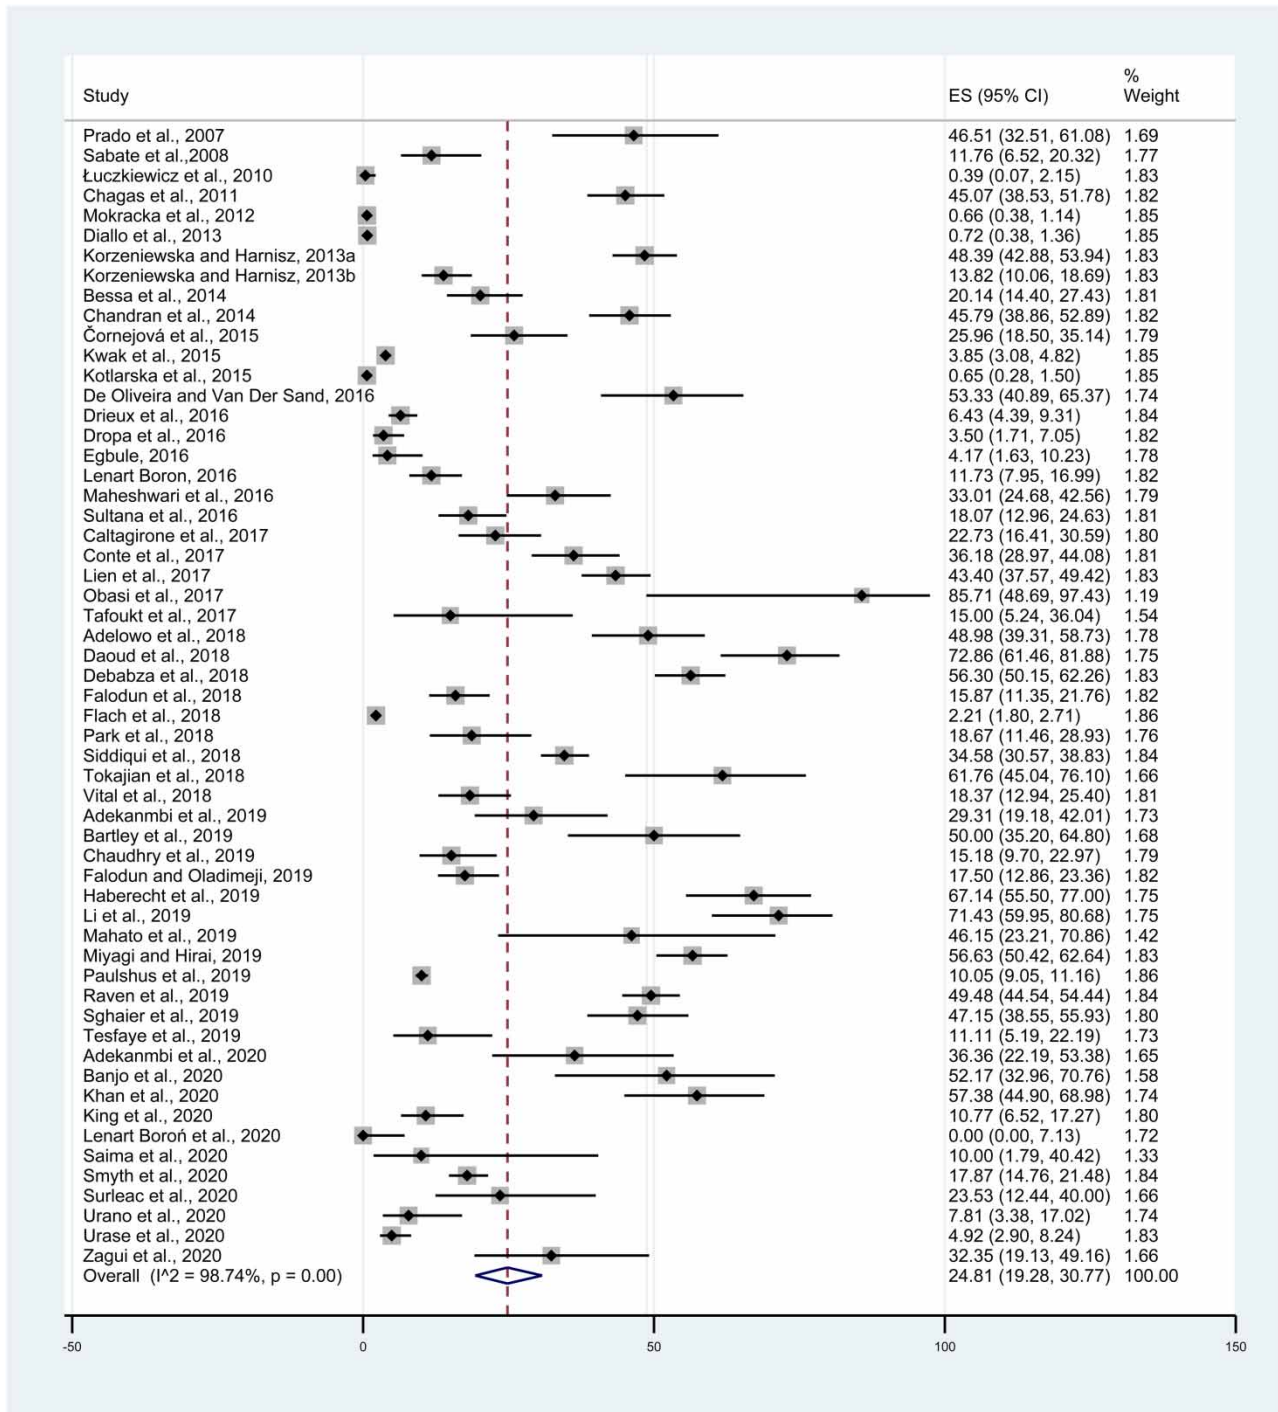

**Figure 2** | Pooled prevalence of ESBL-producing *Enterobacteriaceae* in wastewater. Studies are sorted alphabetically, squares represent effect sizes of individual studies and the diamond indicates the estimated pooled effect size. CI, confidence interval.

isolating *Enterobacteriaceae* first, and these studies were not included in our study because the total number of isolates is absent. Moreover, most of the included studies on ESBL-E in treated wastewater did not report the type of treatment used, so we were obligated to put three categories (treated and untreated, treated, and untreated), and another potential limitation of the present study is that statistical results may have been influenced by publication bias based on the visual evaluation

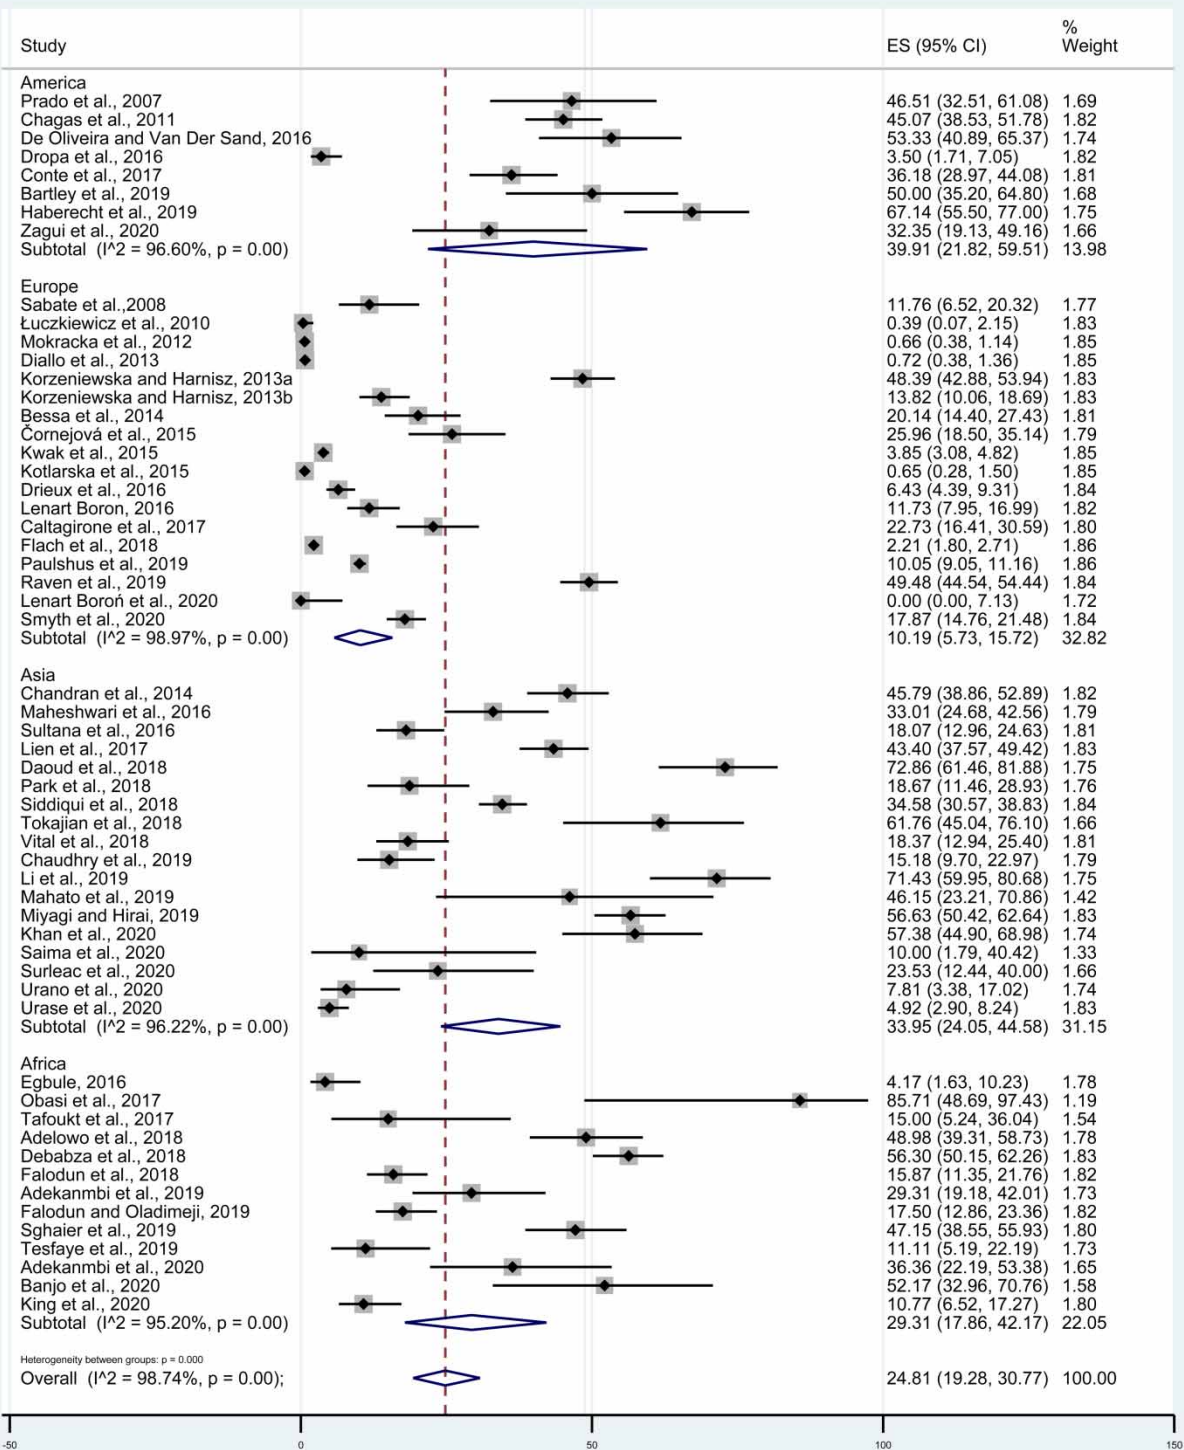

**Figure 3** | Pooled prevalence of ESBL-producing *Enterobacteriaceae* stratified by continents.

of the funnel plot and the Egger test results; this is maybe due to the inherent bias toward reporting positive results; despite our effort to use search strategies that enhance the reporting of negative results, we have only found one study (the study of [Lenart-Boroń et al. \(2020\)](#)) that reported negative data.

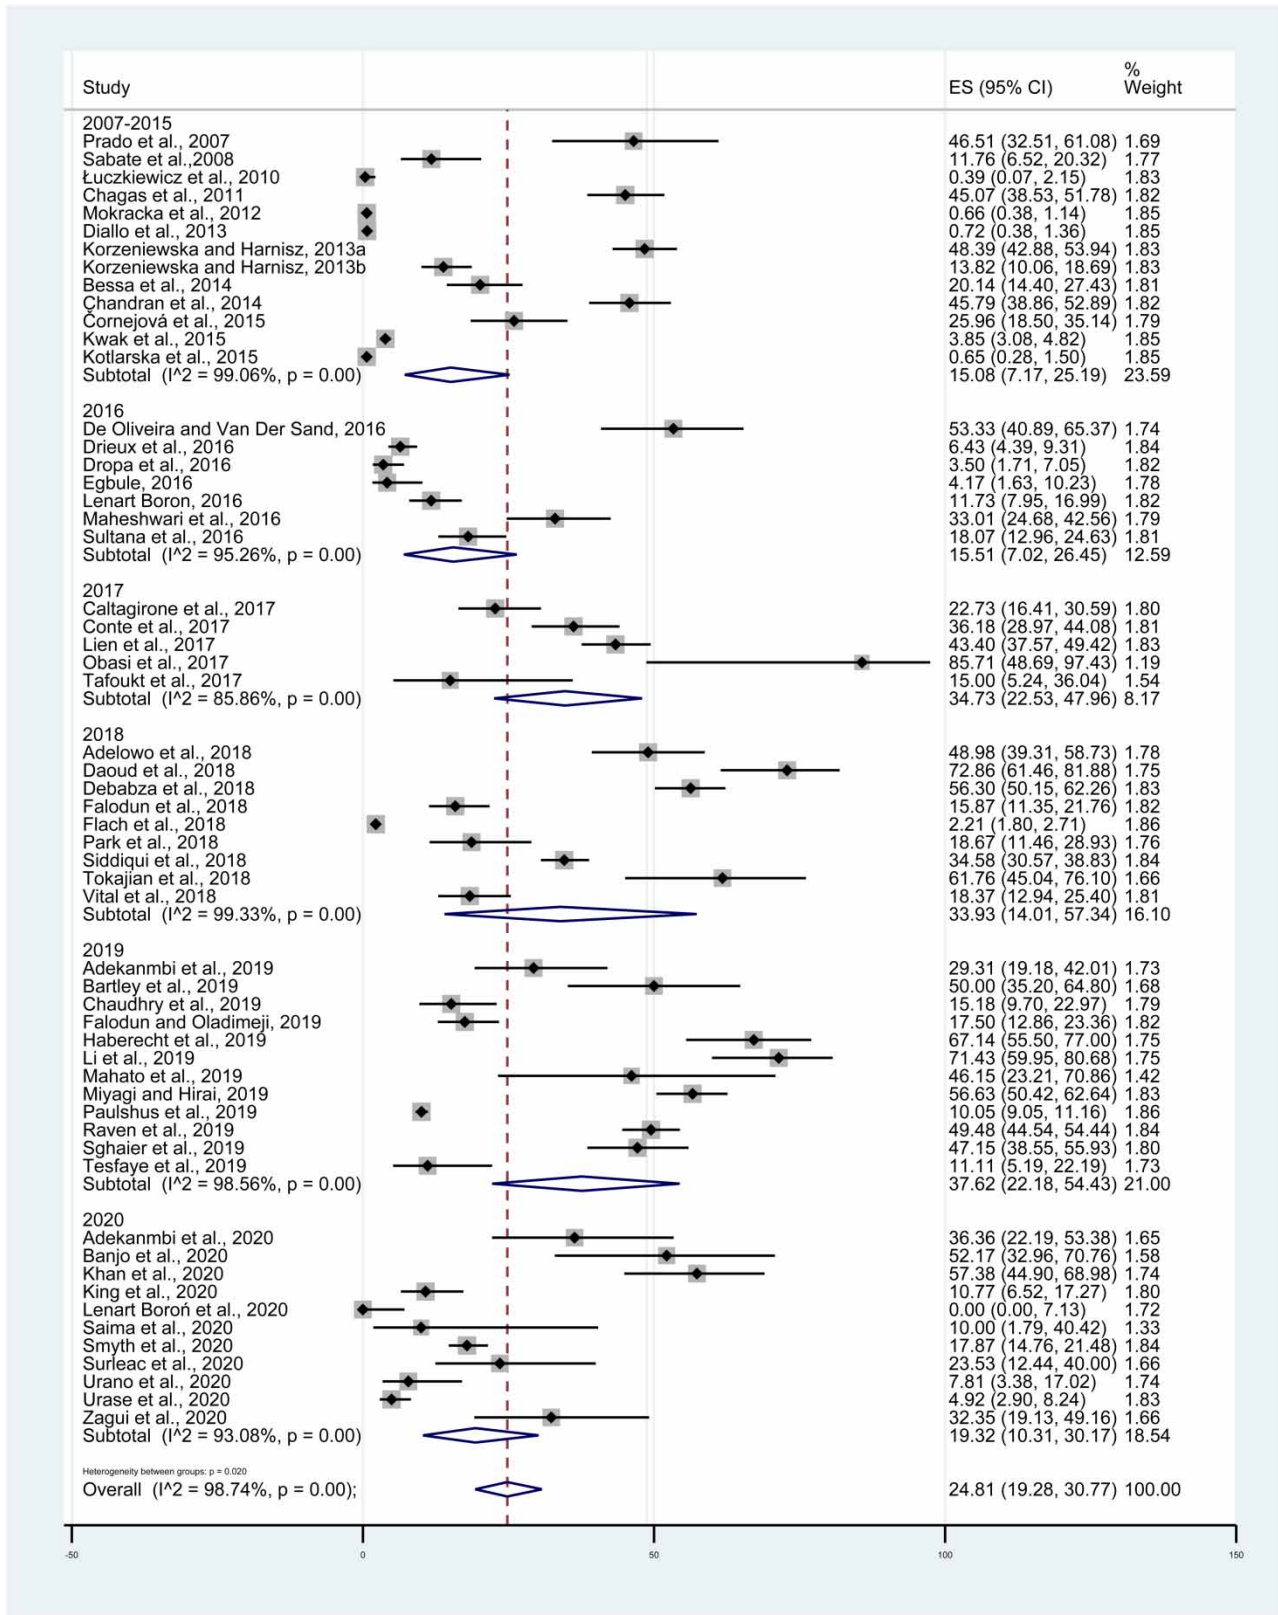

Figure 4 | Pooled prevalence of ESBL-producing *Enterobacteriaceae* stratified by the year of publication.



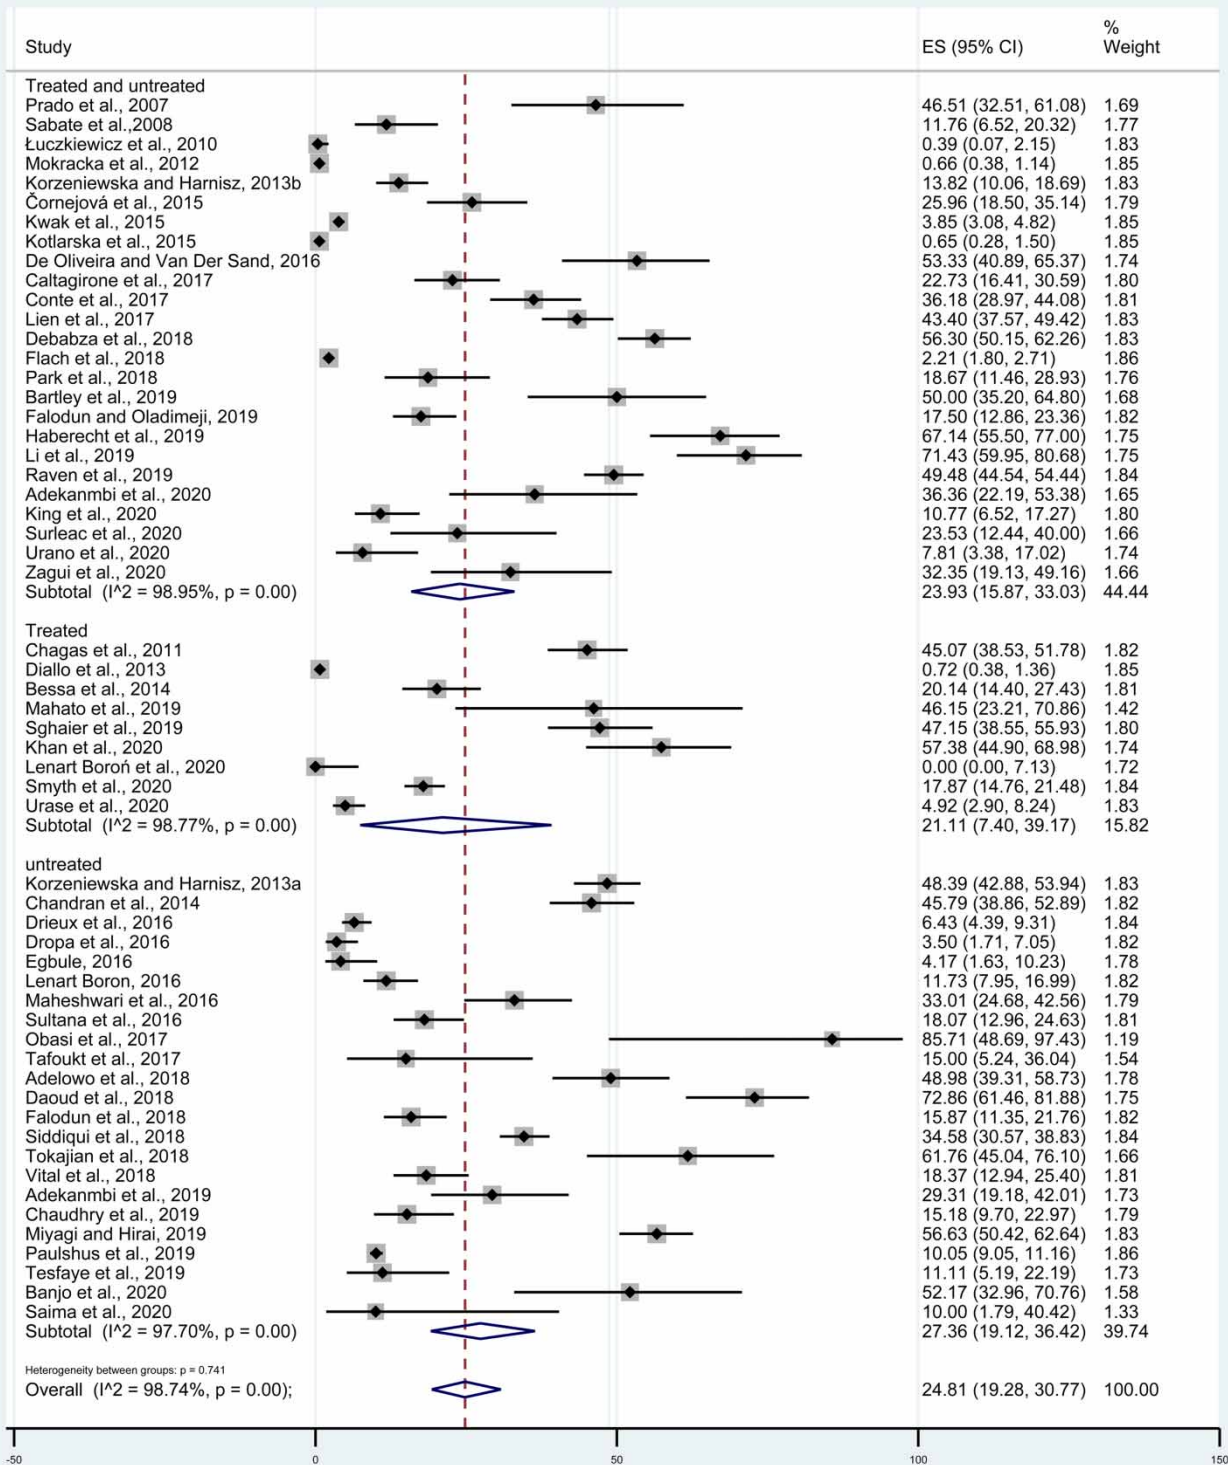

Figure 5 | Pooled prevalence of ESBL-producing *Enterobacteriaceae* stratified by treatments.

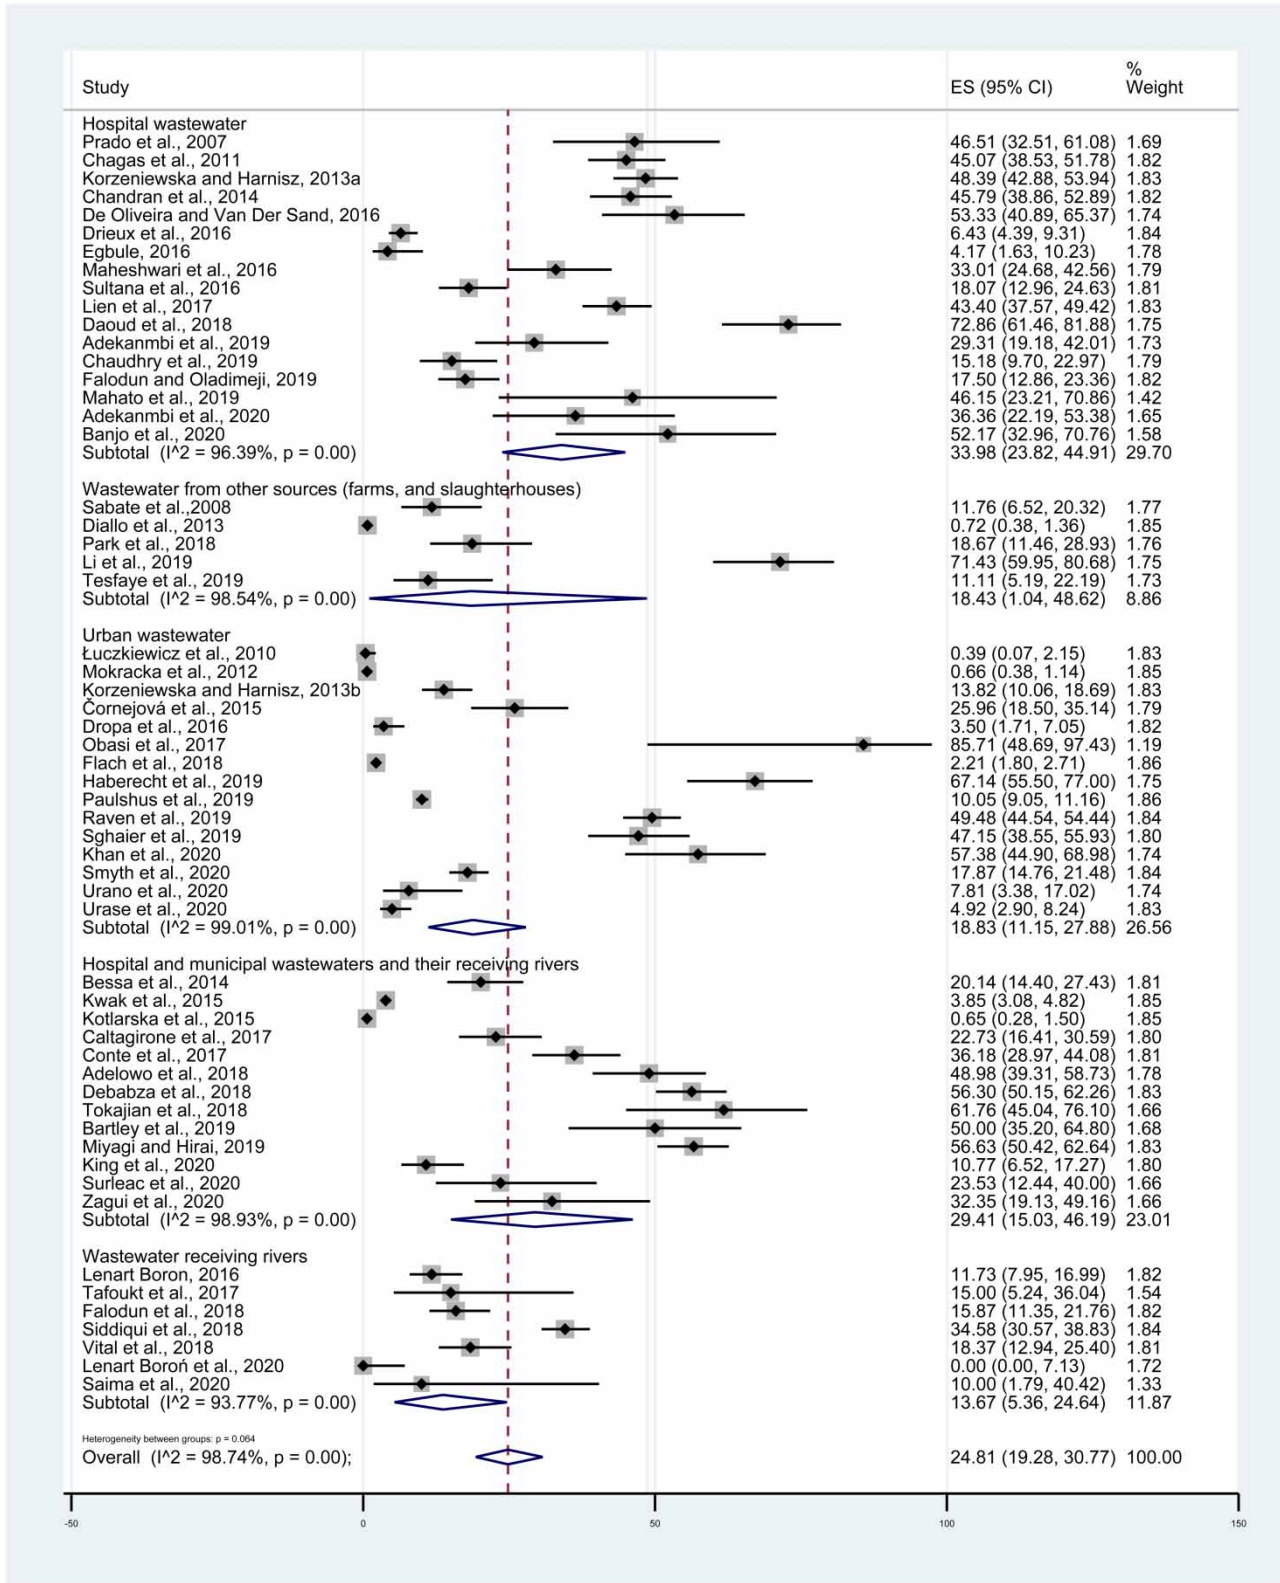

Figure 6 | Pooled prevalence of ESBL-producing *Enterobacteriaceae* stratified by the wastewater origin.

**Table 3** | Meta-analysis of ESBL-E at the species level and ESBL-E gene prevalence in wastewaters

| Subgroups                                | No. of studies | No. of ESBL | No. of <i>Enterobacteriaceae</i> | Pooled estimate (%) of ESBL       | 95% Confidence interval | Heterogeneity $\chi^2$ | Heterogeneity test, $I^2$ (%) | Heterogeneity test, $p$ -value |
|------------------------------------------|----------------|-------------|----------------------------------|-----------------------------------|-------------------------|------------------------|-------------------------------|--------------------------------|
| <b><i>Enterobacteriaceae</i> species</b> |                |             |                                  |                                   |                         |                        |                               |                                |
| <i>E. coli</i>                           | 51             | 2,541       | 19,881                           | 15.05                             | 11.14, 19.41            | 2,902.78               | 98.28                         | <0.001                         |
| <i>Klebsiella</i>                        | 29             | 1,222       | 5,732                            | 9.66                              | 5.83, 14.25             | 665.17                 | 95.79                         | <0.001                         |
| <i>Enterobacter</i>                      | 18             | 1,139       | 5,125                            | 2.39                              | 1.08, 4.09              | 149.25                 | 88.61                         | <0.001                         |
| <i>Citrobacter</i>                       | 8              | 714         | 1,846                            | 2.69                              | 0.50, 6.23              | 87.10                  | 91.96                         | <0.001                         |
| <i>Shigella</i>                          | 7              | 619         | 1,578                            | 2.10                              | 0.66, 4.19              | 28.58                  | 79.01                         | <0.001                         |
| <i>Proteus</i>                           | 6              | 323         | 900                              | 3.80                              | 1.61, 6.76              | 18.02                  | 72.26                         | <0.001                         |
| <i>Serratia</i>                          | 5              | 481         | 1,036                            | 3.37                              | 0.27, 8.89              | 48.36                  | 91.73                         | <0.001                         |
| Other species                            | 12             | 785         | 2,064                            | 3.07                              | 1.04, 5.96              | 169.26                 | 93.50                         | <0.001                         |
| <b>ESBL genes</b>                        |                |             |                                  |                                   |                         |                        |                               |                                |
|                                          | No. of studies | No. of ESBL | No. of <i>Enterobacteriaceae</i> | Pooled estimate (%) of ESBL genes | 95% Confidence interval | Heterogeneity $\chi^2$ | Heterogeneity test, $I^2$ (%) | Heterogeneity test, $p$ -value |
| <i>bla</i> <sub>CTX-M</sub>              | 30             | 1,621       | 7,532                            | 66.82%                            | 52.57, 79.79            | 691.61                 | 96.10                         | <0.001                         |
| <i>bla</i> <sub>TEM</sub>                | 25             | 1,292       | 4,888                            | 51.01%                            | 35.52, 66.40            | 661.40                 | 96.37                         | <0.001                         |
| <i>bla</i> <sub>SHV</sub>                | 25             | 1,044       | 4,875                            | 24.59%                            | 15.42, 34.91            | 239.93                 | 90.41                         | <0.001                         |



**Table 4** | Summary results of univariable and multivariable meta-regression of the effects of confounding factors on ESBL-E occurrence in wastewaters

| Moderators                                                    | Coef. <sup>b</sup> (95% CI) <sup>c</sup> |      |       | SE                      | p-value | Coef. (95% CI)           |   |   | SE | p-value |
|---------------------------------------------------------------|------------------------------------------|------|-------|-------------------------|---------|--------------------------|---|---|----|---------|
|                                                               | Univariable regression                   |      |       |                         |         | Multivariable regression |   |   |    |         |
| <b>Continents</b>                                             |                                          |      |       |                         |         |                          |   |   |    |         |
| Europe <sup>a</sup>                                           | –                                        | –    | –     | –                       | –       | –                        | – | – | –  | –       |
| Asia                                                          | 0.22 (0.08, 0.35)                        | 0.06 | 0.002 | 0.14 (–0.01, 0.31)      | 0.08    | 0.078                    |   |   |    |         |
| Africa                                                        | 0.16 (0.007, 0.31)                       | 0.07 | 0.040 | 0.06 (–0.11, 0.24)      | 0.09    | 0.507                    |   |   |    |         |
| America                                                       | 0.26 (0.08, 0.44)                        | 0.09 | 0.003 | 0.22 (0.04, 0.39)       | 0.08    | 0.012                    |   |   |    |         |
| <b>Wastewater origin</b>                                      |                                          |      |       |                         |         |                          |   |   |    |         |
| Hospital wastewater <sup>a</sup>                              | –                                        | –    | –     | –                       | –       | –                        | – | – | –  | –       |
| Municipal wastewater                                          | –0.13<br>(–0.27, 0.016)                  | 0.07 | 0.081 | –0.11 (–0.27, 0.05)     | 0.08    | 0.183                    |   |   |    |         |
| Wastewater effluents in rivers                                | –0.17<br>(–0.37, 0.017)                  | 0.10 | 0.074 | –0.28<br>(–0.41, 0.008) | 0.10    | 0.060                    |   |   |    |         |
| Hospital and municipal wastewaters and their receiving rivers | –0.03<br>(–0.19, 0.11)                   | 0.07 | 0.650 | –0.05 (–0.21, 0.11)     | 0.08    | 0.557                    |   |   |    |         |
| Wastewater from other sources (farms and slaughterhouses)     | –0.13 (–0.34, 0.08)                      | 0.10 | 0.222 | –0.14<br>(–0.36, 0.06)  | 0.10    | 0.163                    |   |   |    |         |
| <b>Treatments</b>                                             |                                          |      |       |                         |         |                          |   |   |    |         |
| Treated and untreated wastewater <sup>a</sup>                 | –                                        | –    | –     | –                       | –       | –                        | – | – | –  | –       |
| Untreated wastewater                                          | 0.02 (–0.10, 0.14)                       | 0.06 | 0.733 | 0.016 (–0.13, 0.16)     | 0.07    | 0.829                    |   |   |    |         |
| Treated wastewater                                            | –0.01 (–0.18, 0.14)                      | 0.08 | 0.816 | 0.04 (–0.11, 0.20)      | 0.08    | 0.604                    |   |   |    |         |
| <b>Year of publication</b>                                    |                                          |      |       |                         |         |                          |   |   |    |         |
| 2007–2015                                                     | –                                        | –    | –     | –                       | –       | –                        | – | – | –  | –       |
| 2016                                                          | –0.01 (–0.19, 0.16)                      | 0.09 | 0.851 | –0.11 (–0.31, 0.09)     | 0.10    | 0.276                    |   |   |    |         |
| 2017                                                          | 0.16 (–0.06, 0.38)                       | 0.11 | 0.158 | 0.08 (–0.14, 0.31)      | 0.11    | 0.483                    |   |   |    |         |
| 2018                                                          | 0.15 (–0.01, 0.32)                       | 0.08 | 0.073 | 0.14 (–0.06, 0.35)      | 0.10    | 0.175                    |   |   |    |         |
| 2019                                                          | 0.19 (0.03, 0.34)                        | 0.08 | 0.018 | 0.13 (–0.03, 0.31)      | 0.08    | 0.122                    |   |   |    |         |
| 2020                                                          | 0.02 (–0.14, 0.19)                       | 0.08 | 0.784 | –0.01 (–0.20, 0.18)     | 0.09    | 0.911                    |   |   |    |         |

<sup>a</sup>Ref., reference category; Coef., regression coefficient; CI, confidence interval.

## CONCLUDING REMARKS

Based on the 57 studies analyzed in this meta-analysis, we concluded that the prevalence of *Enterobacteriaceae*-producing ESBL in wastewater is increasing over time and that hospital wastewater is the most important repository of ESBL. This study also revealed a high prevalence of the *bla*<sub>CTX-M</sub> genes in *Enterobacteriaceae* isolated from wastewater, which is an alarming indicator of the global spreading of epidemic resistance plasmids.

Hence, these results highlight the need to develop effective strategies and measures adapted for removing ESBL-producing bacteria in wastewater and preventing the dissemination and transmission of antibiotic resistance from wastewater to different aquatic systems. Moreover, further research must focus on developing new sewage treatment systems that decrease the introduction of resistant bacteria and antibiotic residues.

## FUNDING

This work received no external funding.

## CONFLICT OF INTEREST

The authors declare no conflict of interest.

## AUTHORS' CONTRIBUTIONS

NZ: conceptualization, writing and editing; SB and NS: investigation and writing.

## DATA AVAILABILITY STATEMENT

All relevant data are included in the paper or its Supplementary Information.

## REFERENCES

- Adekanmbi, A. O., Adeyemi, A. O. & Olajide, O. M. 2019 Occurrence of multidrug resistant and extended spectrum  $\beta$ -lactamase (ESBL)–*Escherichia coli* in wastewater of two healthcare facilities in Ibadan, Nigeria. *World News Nat. Sci.* **26**, 167–175.
- Adekanmbi, A. O., Akinpelu, M. O., Olaposi, A. V. & Oyelade, A. A. 2020 Extended spectrum beta-lactamase encoding gene-fingerprints in multidrug resistant *Escherichia coli* isolated from wastewater and sludge of a hospital treatment plant in Nigeria. *Int. J. Environ. Sci.*, **78** (1), 140–150.
- Adelowo, O. O., Caucci, S., Banjo, O. A., Nnanna, O. C., Awotipe, E. O., Peters, F. B., Fagade, O. E. & Berendonk, T. U. 2018 Extended spectrum beta-lactamase (ESBL)-producing bacteria isolated from hospital wastewaters, rivers and aquaculture sources in Nigeria. *Environ. Sci. Pollut. Res. Int.* **25** (3), 2744–2755.
- Amirkamali, S., Naserpour-Farivar, T., Azarhoosh, K. & Peymani, A. 2017 Distribution of the bla OXA, bla VEB-1, and bla GES-1 genes and resistance patterns of ESBL-producing *Pseudomonas aeruginosa* isolated from hospitals in Tehran and Qazvin, Iran. *Rev. Soc. Bras. Med. Trop.* **50** (3), 315–320.
- Azuma, T. & Hayashi, T. 2020 Effects of natural sunlight on antimicrobial-resistant bacteria (AMRB) and antimicrobial-susceptible bacteria (AMSB) in wastewater and river water. *Sci. Total. Environ.* **766**, 142568.
- Banjo, O. A., Adekanmbi, A. O. & Oyelade, A. A. 2020 Occurrence of CTX-M, SHV and TEM  $\beta$ -lactamase genes in extended spectrum beta-lactamase (ESBL) producing bacteria recovered from wastewater of a privately-owned hospital in Nigeria and a hand-dug well within its vicinity. *Gene. Rep.* **21**, 100970.
- Bartley, P. S., Domitrovic, T. N., Moretto, V. T., Santos, C. S., Ponce-Terashima, R., Reis, M. G., Barbosa, L. M., Blanton, R. E., Bonomo, R. A. & Perez, F. 2019 Antibiotic resistance in *Enterobacteriaceae* from surface waters in urban Brazil highlights the risks of poor sanitation. *Am. J. Trop. Med. Hyg.* **100** (6), 1369–1377.
- Behnam, B., Oishi, S. N., Uddin, S. M. N., Rafa, N., Nasiruddin, S. M., Mollah, A. M. & Hongzhi, M. 2020 Inadequacies in hospital waste and sewerage management in Chattogram, Bangladesh: exploring environmental and occupational health hazards. *Sustainability* **12** (21), 9077.
- Bessa, L. J., Barbosa-Vasconcelos, A., Mendes, Â., Vaz-Pires, P. & Martins da Costa, P. 2014 High prevalence of multidrug-resistant *Escherichia coli* and *Enterococcus* spp. In river water, upstream and downstream of a wastewater treatment plant. *J. Water Health* **12** (3), 426–435.
- Bonomo, R. A. 2017  $\beta$ -Lactamases: a focus on current challenges. *Cold Spring Harbor Perspect. Biol.* **7** (1), a025239.
- Caltagirone, M., Nucleo, E., Spalla, M., Zara, F., Novazzi, F., Marchetti, V. M., Piazza, Bitar, I., De Cicco, M., Paolucci, S., Pilla, G., Migliavacca, R. & Pagani, L. 2017 Occurrence of extended spectrum  $\beta$ -lactamases, KPC-type, and MCR-1.2-producing *Enterobacteriaceae* from wells, river water, and wastewater treatment plants in Oltrepò Pavese area, northern Italy. *Front. Microbiol.* **8**, 2232.
- Cantón, R., González-Alba, J. M. & Galán, J. C. 2012 CTX-M enzymes: origin and diffusion. *Front. Microbiol.* **2**, 110.
- Chagas, T. P., Seki, L. M., Cury, J. C., Oliveira, J. A., Dávila, A. M., Silva, D. M. & Asensi, M. D. 2011 Multiresistance, beta-lactamase-encoding genes and bacterial diversity in hospital wastewater in Rio de Janeiro, Brazil. *J. Appl. Microbiol.* **111** (3), 572–581.
- Chandran, S. P., Diwan, V., Tamhankar, A. J., Joseph, B. V., Rosales-Klitz, S., Mundayoor, S., Lundborg, C. S. & Macaden, R. 2014 Detection of carbapenem resistance genes and cephalosporin, and quinolone resistance genes along with *oqxAB* gene in *Escherichia coli* in hospital wastewater: a matter of concern. *J. Appl. Microbiol.* **117** (4), 984–995.
- Chaudhry, T., Aslam, B., Arshad, M., Nawaz, Z. & Waseem, M. 2019 Occurrence of ESBL-producing *Klebsiella pneumoniae* in hospital settings and waste. *Pak. J. Pharm. Sci.* **32** (2), 773–778.
- Conte, D., Palmeiro, J. K., da Silva Nogueira, K., de Lima, T. M. R., Cardoso, M. A., Pontarolo, R., Degaut Pontes, F. L. & Dalla-Costa, L. M. 2017 Characterization of CTX-M enzymes, quinolone resistance determinants, and antimicrobial residues from hospital sewage, wastewater treatment plant, and river water. *Ecotoxicol. Environ. Saf.* **136**, 62–69.
- Čornejová, T., Venglovský, J., Gregova, G., Kmetova, M. & Kmet, V. 2015 Extended spectrum beta-lactamases in *Escherichia coli* from municipal wastewater. *Ann. Agric. Environ. Med.* **22** (3), 447–450.
- Daoud, Z., Farah, J., Sokhn, E. S., El Kfoury, K., Dahdouh, E., Masri, K., Afif, C., Abdel-Massih, R. M. & Matar, G. M. 2018 Multidrug-resistant *Enterobacteriaceae* in Lebanese hospital wastewater: implication in the one health concept. *Microb. Drug Resist.* **24** (2), 166–174.

- Debabza, M., Mechai, A., Mechai, A., Sedira, H., Fadeleddine, S., Halaimia, H., Difallah, M., Nasri, I., Brahimi, A., Saddar, F. & Aliani, A. 2018 Dissemination of extended-spectrum beta-lactamase-producing Enterobacteriaceae in an urban wastewater treatment plant and their emission to a river. *J. Environ. Eng.* **144** (2), 04017093.
- De Oliveira, D. V. & Van Der Sand, S. T. 2016 Phenotypic tests for the detection of  $\beta$ -lactamase-producing Enterobacteriaceae isolated from different environments. *Curr. Microbiol.* **73** (1), 132–138.
- Diallo, A. A., Brugère, H., Kérouredan, M., Dupouy, V., Toutain, P. L., Bousquet-Mélou, A., Oswald, E. & Bibbal, D. 2013 Persistence and prevalence of pathogenic and extended-spectrum beta-lactamase-producing *Escherichia coli* in municipal wastewater treatment plant receiving slaughterhouse wastewater. *Water Res.* **47** (13), 4719–4729.
- Drieux, L., Haenn, S., Moulin, L. & Jarlier, V. 2016 Quantitative evaluation of extended-spectrum  $\beta$ -lactamase-producing *Escherichia coli* strains in the wastewater of a French teaching hospital and relation to patient strain. *Antimicrob. Resist. Infect. Control.* **5**, 9.
- Dropa, M., Lincopan, N., Balsalobre, L. C., Oliveira, D. E., Moura, R. A., Fernandes, M. R., da Silva, Q. M., Matté, G. R., Sato, M. I. Z. & Matté, M. H. 2016 Genetic background of novel sequence types of CTX-M-8- and CTX-M-15-producing *Escherichia coli* and *Klebsiella pneumoniae* from public wastewater treatment plants in São Paulo, Brazil. *Environ. Sci. Pollut. Res.* **23** (5), 4953–4958.
- Du, J., Geng, J., Ren, H., Ding, L., Xu, K. & Zhang, Y. 2015 Variation of antibiotic resistance genes in municipal wastewater treatment plant with A(2)O-MBR system. *Environ. Sci. Pollut. Res. Int.* **22** (5), 3715–3726.
- Duong, H. A., Pham, N. H., Nguyen, H. T., Hoang, T. T., Pham, H. V., Pham, V. C., Berg, M., Giger, W. & Alder, A. C. 2008 Occurrence, fate and antibiotic resistance of fluoroquinolone antibacterials in hospital wastewaters in Hanoi, Vietnam. *Chemosphere* **72** (6), 968–973.
- Egbule, O. S. 2016 Detection and transfer of extended spectrum beta lactamase enzymes from untreated hospital waste water. *Adv. Microbiol.* **6**, 512–520.
- Egger, M., Davey, S. G., Schneider, M. & Minder, C. 1997 Bias in meta-analysis detected by a simple, graphical test. *Br. Med. J.* **315** (7109), 629–634.
- Falodun, O. I. & Oladimeji, O. S. 2019 Extended spectrum beta lactamase (ESBL) producing enteric bacteria from hospital wastewater, Ibadan, Nigeria. *World News Nat. Sci.* **22**, 62–74.
- Falodun, O., Morakinyo, Y. M. & Fagade, O. 2018 Determination of water quality and detection of extended spectrum beta-lactamase producing Gram-negative bacteria in selected rivers located in Ibadan, Nigeria. *J. Biol. Sci.* **11**, 107–112.
- Flach, C. F., Genheden, M., Fick, J. & Joakim Larsson, D. G. 2018 A comprehensive screening of *Escherichia coli* isolates from Scandinavia's largest sewage treatment plant indicates no selection for antibiotic resistance. *Environ. Sci. Technol.* **52**, 11419–11428.
- Fouz, N., Pangesti, K. N. A., Yasir, M., Al-Malki, A. L., Azhar, E. I., Hill-Cawthorne, G. A. & Abd El Ghany, M. 2020 The contribution of wastewater to the transmission of antimicrobial resistance in the environment: implications of mass gathering settings. *Trop. Med. Infect. Dis.* **5** (1), 33.
- Freeman, M. F. & Tukey, J. W. 1950 Transformations related to the angular and the square root. *Ann. Math. Stat.* **21** (4), 607–611.
- Gatica, J. & Cytryn, E. 2013 Impact of treated wastewater irrigation on antibiotic resistance in the soil microbiome. *Environ. Sci. Pollut. Res.* **20** (6), 3529–3538.
- Gelband, H., Miller-Petrie, M., Pant, S., Gandra, S., Levinson, J., Barter, D., White, A. & Laxminarayan, R. 2015 Executive summary: The state of the world's antibiotics. Center for Disease Dynamics, Economics and Policy.
- Haberecht, H. B., Nealon, N. J., Gilliland, J. R., Holder, A. V., Runyan, C., Oppel, R. C., Ibrahim, H. M., Mueller, L., Schrupp, F., Vilchez, S., Antony, L., Scaria, J. & Ryan, E. P. 2019 Antimicrobial-resistant *Escherichia coli* from environmental waters in Northern Colorado. *J. Environ. Public Health* **2019**, 3862949.
- Jang, J., Hur, H. G., Sadowsky, M. J., Byappanahalli, M. N., Yan, T. & Ishii, S. 2017 Environmental *Escherichia coli*: ecology and public health implications—a review. *J. Appl. Microbiol.* **123** (3), 570–581.
- Jesumirhewe, C., Springer, B., Allerberger, F. & Ruppitsch, W. 2020 Whole genome sequencing of extended-spectrum  $\beta$ -lactamase genes in Enterobacteriaceae isolates from Nigeria. *PLoS One* **15** (4), e0231146.
- Khan, M. A., Thurgood, N. E., Faheem, S. M., Rais, N., Ansari, M. Z., Kaleem, S. M. & Khan, S. T. 2020 Occurrence of extended spectrum beta-lactamase Gram-negative bacteria from non-clinical sources in Dubai, United Arab Emirates. *Water* **12** (9), 2562.
- King, T. L. B., Schmidt, S. & Essack, S. Y. 2020 Antibiotic resistant *Klebsiella* spp. from a hospital, hospital effluents and wastewater treatment plants in the uMgungundlovu District, KwaZulu-Natal, South Africa. *Sci. Total Environ.* **712**, 135550.
- Kola, A., Maciejewski, O., Sohr, D., Ziesing, S. & Gastmeier, P. 2007 Clinical impact of infections caused by ESBL-producing *E. coli* and *K. pneumoniae*. *Scand. J. Infect. Dis.* **39** (11–12), 975–982.
- Korzeniewska, E. & Harnisz, M. 2013a Beta-lactamase-producing Enterobacteriaceae in hospital effluents. *J. Environ. Manage.* **123**, 1–7.
- Korzeniewska, E. & Harnisz, M. 2013b Extended-spectrum beta-lactamase (ESBL)-positive Enterobacteriaceae in municipal sewage and their emission to the environment. *J. Environ. Manage.* **128**, 904–911.
- Kotlarska, E., Łuczkiwicz, A., Pisowacka, M. & Burzyński, A. 2015 Antibiotic resistance and prevalence of class 1 and 2 integrons in *Escherichia coli* isolated from two wastewater treatment plants, and their receiving waters (Gulf of Gdansk, Baltic Sea, Poland). *Environ. Sci. Pollut. Res.* **22** (3), 2018–2030.
- Kümmerer, K. 2009 Antibiotics in the aquatic environment – a review – part I. *Chemosphere* **75** (4), 417–434.
- Kwak, Y. K., Colque, P., Byfors, S., Giske, C. G., Möllby, R. & Kühn, I. 2015 Surveillance of antimicrobial resistance among *Escherichia coli* in wastewater in Stockholm during 1 year: does it reflect the resistance trends in the society? *Int. J. Antimicrob. Agents* **45** (1), 25–32.

- Lenart-Boroń, A. 2016 Antimicrobial resistance and prevalence of extended-spectrum beta-lactamase genes in *Escherichia coli* from major rivers in Podhale, southern Poland. *Int. J. Environ. Sci. Technol.* **14** (2017), 241–250.
- Lenart-Boroń, A. M., Kulik, K. & Jelonkiewicz, E. 2020 Antimicrobial resistance and ESBL genes in *E. coli* isolated in proximity to a sewage treatment plant. *J. Environ. Sci. Health A* **55** (14), 1571–1580.
- Lepuschitz, S., Schill, S., Stoeger, A., Pekard-Amenitsch, S., Huhulescu, S., Inreiter, N., Hartl, R., Kerschner, H. & Ruppitsch, W. 2019 Whole genome sequencing reveals resemblance between ESBL-producing and carbapenem resistant *Klebsiella pneumoniae* isolates from Austrian rivers and clinical isolates from hospitals. *Sci. Total Environ.* **662**, 227–235.
- Li, Q., Chang, W., Zhang, H., Hu, D. & Wang, X. 2019 The role of plasmids in the multiple antibiotic resistance transfer in ESBLs-producing *Escherichia coli* isolated from wastewater treatment plants. *Front. Microbiol.* **10**, 633.
- Lien, L. T. Q., Lan, P. T., Chuc, N. T. K., Hoa, N. Q., Nhung, P. H., Thoa, N. T. M., Diwan, V., Tamhankar, A. J. & Stålsby Lundborg, C. 2017 Antibiotic resistance and antibiotic resistance genes in *Escherichia coli* isolates from hospital wastewater in Vietnam. *Int. J. Environ. Res. Public Health* **14** (7), 699.
- Luczkiewicz, A., Jankowska, K., Fudala-Książek, S. & Olańczuk-Neyman, K. 2010 Antimicrobial resistance of fecal indicators in municipal wastewater treatment plant. *Water Res.* **44** (17), 5089–5097.
- Mahato, S., Mahato, A., Pokharel, E. & Tamrakar, A. 2019 Detection of extended-spectrum beta-lactamase-producing *E. coli* and *Klebsiella* spp. in effluents of different hospitals sewage in Biratnagar, Nepal. *BMC Res. Notes* **12** (1), 641.
- Maheshwari, M., Yaser, N. H., Naz, S., Fatima, M. & Ahmad, I. 2016 Emergence of ciprofloxacin-resistant extended-spectrum  $\beta$ -lactamase-producing enteric bacteria in hospital wastewater and clinical sources. *J. Glob. Antimicrob. Resist.* **5**, 22–25.
- Marti, E., Jofre, J. & Balcazar, J. L. 2013 Prevalence of antibiotic resistance genes and bacterial community composition in a river influenced by a wastewater treatment plant. *PLoS One* **8** (10), e78906.
- Meletis, G. 2016 Carbapenem resistance: overview of the problem and future perspectives. *Ther. Adv. Infect. Dis.* **3** (1), 15–21.
- Miyagi, K. & Hirai, I. 2019 A survey of extended-spectrum  $\beta$ -lactamase-producing Enterobacteriaceae in environmental water in Okinawa prefecture of Japan and relationship with indicator organisms. *Environ. Sci. Pollut. Res.* **26** (8), 7697–7710.
- Moher, D., Liberati, A., Tetzlaff, J. M. & Altman, D. G. 2009 PRISMA group. Preferred reporting items for systematic reviews and meta-analyses: the PRISMA statement. *J. Clin. Epidemiol.* **62** (7), 1006e12.
- Mokracka, J., Koczura, R. & Kaznowski, A. 2012 Multiresistant Enterobacteriaceae with class 1 and class 2 integrons in a municipal wastewater treatment plant. *Water Res.* **46** (10), 3353–3363.
- Munn, Z., Moola, S., Lisy, K., Riitano, D. & Tufanaru, C. 2015 Methodological guidance for systematic reviews of observational epidemiological studies reporting prevalence and incidence data. *Int. J. Evid. Based Healthc.* **13** (3), 147–153.
- Numberger, D., Ganzert, L., Zoccarato, L., Mühldorfer, K., Sauer, S., Grossart, H. P. & Greenwood, A. D. 2019 Characterization of bacterial communities in wastewater with enhanced taxonomic resolution by full-length 16S rRNA sequencing. *Sci. Rep.* **9** (1), 9673.
- Nyaga, V. N., Arbyn, M. & Aerts, M. 2014 Metaprop: a Stata command to perform meta-analysis of binomial data. *Arch. Public Health* **72** (1), 39.
- Obasi, A., Nwachukwu, S., Ugoji, E., Kohler, C., Göhler, A., Balau, V., Pfeifer, Y. & Steinmetz, I. 2017 Extended-spectrum  $\beta$ -lactamase-producing *Klebsiella pneumoniae* from pharmaceutical wastewaters in South-Western Nigeria. *Microb. Drug Resist.* **23** (8), 1013–1018.
- Park, J. H., Kim, Y. J. & BinnKim Seo, K. H. 2018 Spread of multidrug-resistant *Escherichia coli* harboring integron via swine farm waste water treatment plant. *Ecotoxicol. Environ. Saf.* **149**, 36–42.
- Paulshus, E., Thorell, K., Guzman-Otazo, J., Joffre, E., Colque, P., Kühn, I., Möllby, R., Sørum, H. & Sjöling, Å. 2019 Repeated isolation of extended-spectrum- $\beta$ -lactamase-positive *Escherichia coli* sequence types 648 and 131 from community wastewater indicates that sewage systems are important sources of emerging clones of antibiotic-resistant bacteria. *Antimicrob. Agents Chemother.* **63** (9), e00823-19.
- Pishtiwani, A. H. & Khadija, K. M. 2019 Prevalence of blaTEM, blaSHV, and blaCTX-M genes among ESBL-producing *Klebsiella pneumoniae* and *Escherichia coli* isolated from Thalassemia patients in Erbil, Iraq. *Mediterr. J. Hematol. Infect. Dis.* **11** (1), e2019041.
- Prado, T., Pereira, W. C., Silva, D. M., Seki, L. M., Carvalho, A. P. D. & Asensi, M. D. 2007 Detection of extended-spectrum  $\beta$ -lactamase-producing *Klebsiella pneumoniae* in effluents and sludge of a hospital sewage treatment plant. *Lett. Appl. Microbiol.* **46** (1), 136–141.
- Preisner, M. 2020 Surface water pollution by untreated municipal wastewater discharge due to a sewer failure. *Environ. Process.* **7**, 767–780.
- Rahman, S., Ali, T., Ali, I., Khan, N. A., Han, B. & Gao, J. 2018 The growing genetic and functional diversity of extended spectrum beta-lactamases. *Biomed. Res. Int.* **26**, 9519718.
- Raven, K. E., Ludden, C., Gouliouris, T., Blane, B., Naydenova, P., Brown, N. M., Parkhill, J. & Peacock, S. J. 2019 Genomic surveillance of *Escherichia coli* in municipal wastewater treatment plants as an indicator of clinically relevant pathogens and their resistance genes. *Microb. Genom.* **5** (5), e000267.
- Reinthalder, F. F., Feierl, G., Galler, H., Haas, D., Leitner, E., Mascher, F., Melkes, A., Posch, J., Winter, I., Zarfel, G. & Marth, E. 2010 ESBL-producing *E. coli* in Austrian sewage sludge. *Water Res.* **44** (6), 1981–1985.
- Sabaté, M., Prats, G., Moreno, E., Ballesté, E., Blanch, A. R. & Andreu, A. 2008 Virulence and antimicrobial resistance profiles among *Escherichia coli* strains isolated from human and animal wastewater. *Res. Microbiol.* **159** (4), 288–293.
- Saima, S., Fiaz, M., Manzoor, M., Zafar, R., Ahmed, I., Nawaz, U. & Arsha, M. 2020 Molecular investigation of antibiotic resistant bacterial strains isolated from wastewater streams in Pakistan. *J. Biotech* **10** (9), 378.
- Sghaier, S., Abbassi, M. S., Pascual, A., Serrano, L., Díaz-De-Alba, P., Said, M. B., Hassen, B., Ibrahim, C., Hassen, A. & López-Cerero, L. 2019 Extended-spectrum  $\beta$ -lactamase-producing Enterobacteriaceae from animal origin and wastewater in Tunisia: first detection of



- O25b-B23-CTX-M-27-ST131 *Escherichia coli* and CTX-M-15/OXA-204-producing *Citrobacter freundii* from wastewater. *J. Glob. Antimicrob. Resist.* **17**, 189–194.
- Shakya, P., Shrestha, D., Maharjan, E., Sharma, V. K. & Paudyal, R. 2017 ESBL production among *E. coli* and *Klebsiella* spp. causing urinary tract infection: a hospital based study. *Open Microbiol. J.* **11**, 23–30.
- Siddiqui, K., Mondal, A., Siddiqui, M. T., Azam, M. & Rizwanul, Q. 2018 Prevalence and molecular characterization of ESBL producing *Enterobacteriaceae* from highly polluted stretch of river Yamuna, India. *Microb. Biotechnol. Lett.* **46** (2), 135–144.
- Smyth, C., O'Flaherty, A., Walsh, F. & Do, T. T. 2020 Antibiotic resistant and extended-spectrum  $\beta$ -lactamase producing faecal coliforms in wastewater treatment plant effluent. *Environ. Pollut.* **262**, 114244.
- Sultana, M., Hossain, M. A., Naeem, N., Sultana, S., Sultana, K. F. & Mukharje, S. K. 2016 Screening of extended spectrum beta-lactamase producing bacteria in clinical liquid waste, Bangladesh. *Med. Res. Counc. Bull.* **42** (1), 39–48.
- Surleac, M., Czobor Barbu, I., Paraschiv, S., Popa, L. I., Gheorghe, I., Marutescu, L., Popa, M., Sarbu, I., Talapan, D., Nita, M., Iancu, A. V., Arbune, M., Manole, A., Nicolescu, S., Sandulescu, O., Streinu-Cercel, A., Otelea, D. & Chifiriuc, M. C. 2020 Whole genome sequencing snapshot of multi-drug resistant *Klebsiella pneumoniae* strains from hospitals and receiving wastewater treatment plants in Southern Romania. *PLoS ONE* **15** (1), e0228079.
- Tafoukt, R., Touati, A., Leangapichart, T., Bakour, S. & Rolain, J. M. 2017 Characterization of OXA-48-like-producing *Enterobacteriaceae* isolated from river water in Algeria. *Water Res.* **120**, 185–189.
- Tanaka, H., Hayashi, W., Iimura, M., Taniguchi, Y., Soga, E., Matsuo, N., Kawamura, K., Arakawa, Y., Nagano, Y. & Nagano, N. 2019 Wastewater as a probable environmental reservoir of extended-spectrum- $\beta$ -lactamase genes: detection of chimeric  $\beta$ -lactamases CTX-M-64 and CTX-M-123. *Appl. Environ. Microbiol.* **85** (22), e01740-19.
- Teklu, D. S., Negeri, A. A., Legese, M. H., Bedada, T. L., Woldemariam, H. K. & Tullu, K. D. 2019 Extended-spectrum beta-lactamase production and multi-drug resistance among *Enterobacteriaceae* isolated in Addis Ababa, Ethiopia. *Antimicrob. Resist. Infect. Control.* **8**, 39.
- Tesfaye, H., Alemayehu, H., Desta, A. F. & Eguale, T. 2019 Antimicrobial susceptibility profile of selected *Enterobacteriaceae* in wastewater samples from health facilities, abattoir, downstream rivers and a WWTP in Addis Ababa, Ethiopia. *Antimicrob. Resist. Infect. Control.* **8** (134), 1.
- Tokajian, S., Moghnieh, R., Salloum, T., Arabaghian, H., Alousi, S., Moussa, J., Abboud, E., Youssef, S. & Husni, R. 2018 Extended-spectrum  $\beta$ -lactamase-producing *Escherichia coli* in wastewaters and refugee camp in Lebanon. *Future Microbiol.* **13**, 81–95.
- Urano, N., Okai, M., Tashiro, Y., Takeuchi, A., Endo, R., Ishida, M. & Takashio, M. 2020 Behavior of antibiotic-resistant fecal coliforms in the stream of a sewage treatment plant in Tokyo. *Adv. Microbiol.* **10** (7), 318–330.
- Urase, T., Okazaki, M. & Tsutsui, H. 2020 Prevalence of ESBL-producing *Escherichia coli* and carbapenem-resistant *Enterobacteriaceae* in treated wastewater: a comparison with nosocomial infection surveillance. *J. Water Health* **18** (6), 899–910.
- Vital, P. G., Zara, E. S., Paraoan, C. E. M., Dimasupil, M. A. Z., Abello, J. J. M., Santos, I. T. G. & Rivera, W. L. 2018 Antibiotic resistance and extended-spectrum beta-lactamase production of *Escherichia coli* isolated from irrigation waters in selected urban farms in metro Manila, Philippines. *Water* **10** (5), 548.
- World Health Organization 2018 *Global Antimicrobial Resistance Surveillance System (GLASS) Report Early Implementation 2017–2018*.
- Zagui, G. S., de Andrade, L. N., Moreira, N. C., Silva, T. V., Machado, G. P., da Costa Darini, A. L. & Segura-Muñoz, S. I. 2020 Gram-negative bacteria carrying  $\beta$ -lactamase encoding genes in hospital and urban wastewater in Brazil. *Environ. Monit. Assess.* **192**, 376.

First received 29 April 2021; accepted in revised form 22 August 2021. Available online 2 September 2021
